# Supplementary material for: Optimizing the fracture toughness of a dual cross-linked hydrogel via molecular dynamics simulation
Source: Royal Society of Chemistry journal article supplement (doi:10.1039/d2cp02478k), 2022-01-01
Supplement: d2cp02478k1.pdf [file d2cp02478k1.pdf]

# Optimizing the fracture toughness of the dual cross-linked hydrogel via molecular dynamics simulation

Nan Hu,<sup>1,2</sup> Yimin Wang,<sup>1,2</sup> Ruibin Ma,<sup>1,2</sup> Wenfeng Zhang,<sup>1,2</sup> Bin Li,<sup>3</sup> Xiuying Zhao<sup>1,2\*</sup>, Liqun  
Zhang,<sup>1,2\*</sup> Yangyang Gao,<sup>1,2\*</sup>

<sup>1</sup>State Key Laboratory of Organic-Inorganic Composites, Beijing University of  
Chemical Technology, 10029, People's Republic of China

<sup>2</sup>Key Laboratory of Beijing City on Preparation and Processing of Novel Polymer  
Materials, Beijing University of Chemical Technology, 10029, People's Republic of  
China

<sup>3</sup>School of Chemical Engineering and Technology, Sun Yat-sen University, Zhuhai  
519082, China

## 1. The definition and calculation method of voids

First, the periodic box is divided into the cubic sub-cells of size  $\Delta$ . Then, whether the polymer beads are within these small sub-cells are checked according to their positions. The sub-cells will be considered to be voids if there are no beads within these sub-cells. Thus, the position of voids can be obtained. Following it, the unoccupied sub-cells will be assigned to the same void if they share a common face (namely they are neighbors). As a result, the number of voids can be calculated. It is noted that the  $\Delta$  of the sub-cell is chosen to be  $1.6\sigma$  in this work, which can ensure no voids at strain=0.0.

---

\* Corresponding author: [gaoyy@mail.buct.edu.cn](mailto:gaoyy@mail.buct.edu.cn) or [zhanglq@mail.buct.edu.cn](mailto:zhanglq@mail.buct.edu.cn)

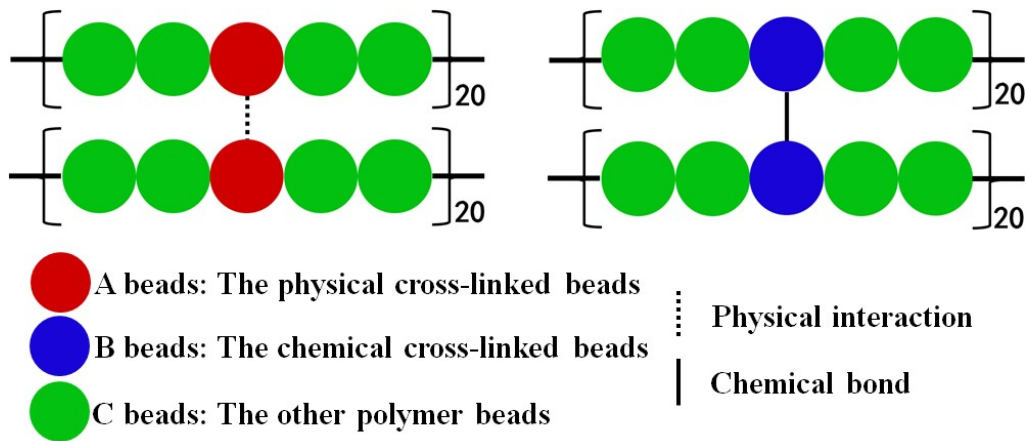

Fig. S1 Schematic diagram of the polymer chain which contains three kinds of beads: (1) The red beads which form the physical network; (2) The blue beads which form the chemical network; (3) The green beads which are the other polymer beads.

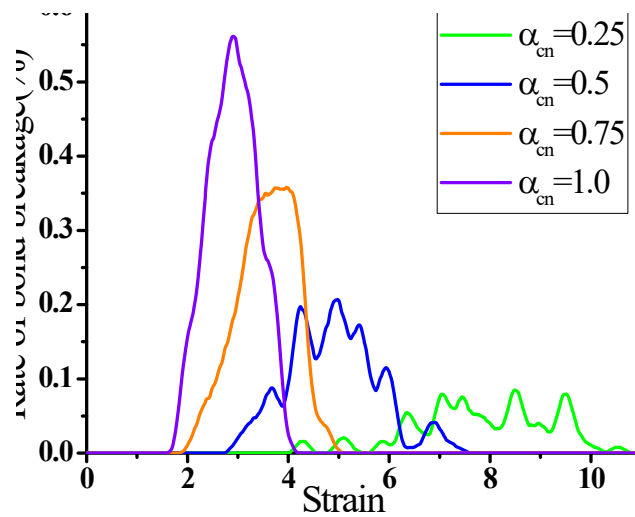

Fig. S2 Rate of bond breakage with respect to the strain for different ratios ( $\alpha_{cn}$ ) of the chemical network to the total networks.

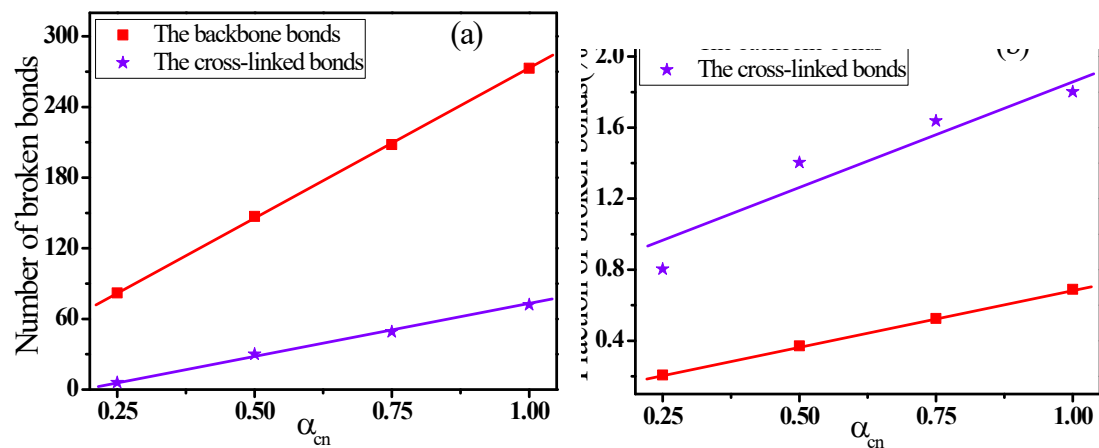

Fig. S3 (a) Number and (b) fraction of broken backbone bonds or cross-linked bonds for different ratios ( $\alpha_{cn}$ ) of the chemical network to the total networks. ( $T^*=1.0$ )

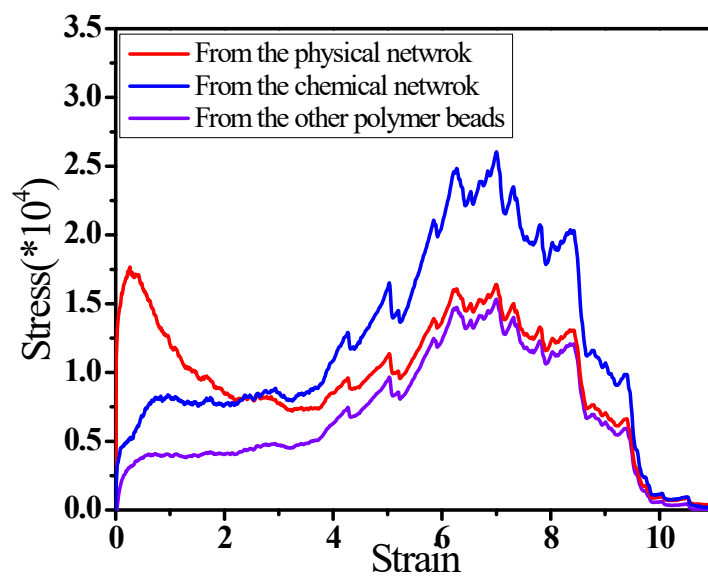

Fig. S4 The stress borne by one bead from physical network, chemical network or other polymer beads as a function of strain. ( $\alpha_{cn}=0.25$ )

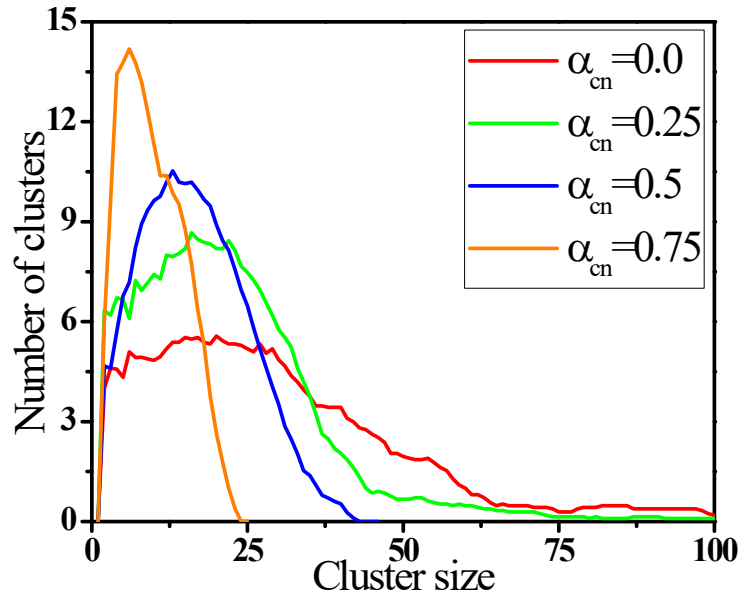

Fig. S5 The number distribution of clusters with the cluster size for different ratios ( $\alpha_{cn}$ ) of the chemical network to the total networks. ( $T^*=1.0$ )

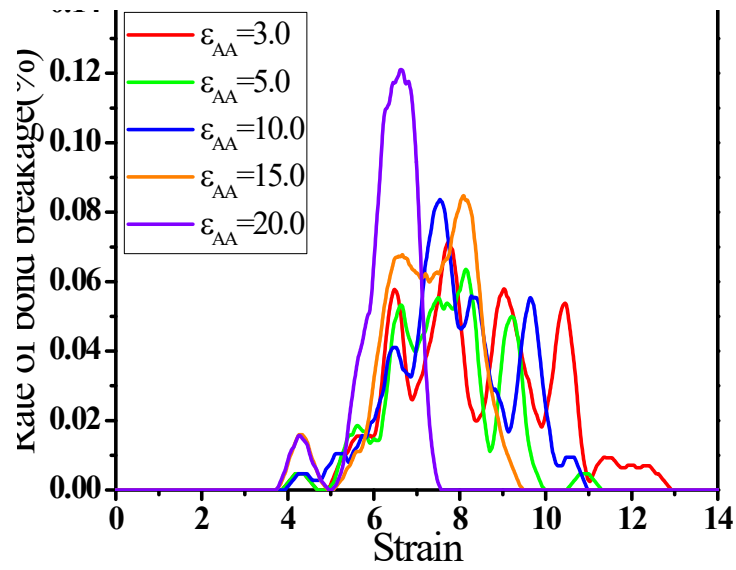

Fig. S6 Rate of bond breakage with respect to strain for different A bead-A bead interactions ( $\epsilon_{AA}$ ). ( $\alpha_{cn}=0.25$ )

**Table SI Parameters of each simulated system**

| System | Chain length | Number of chains | $\alpha_{cn}$ | $N_A$ | $N_B$ | $\epsilon_{AA}$ | $K_{CB}$ |
|--------|--------------|------------------|---------------|-------|-------|-----------------|----------|
| 1      | 100          | 400              | 0.0           | 8000  | 0     | 10.0            | 1000     |
| 2      | 100          | 400              | 0.25          | 6000  | 2000  | 10.0            | 1000     |
| 3      | 100          | 400              | 0.5           | 4000  | 4000  | 10.0            | 1000     |
| 4      | 100          | 400              | 0.75          | 2000  | 6000  | 10.0            | 1000     |
| 5      | 100          | 400              | 1.0           | 0     | 8000  | 10.0            | 1000     |
| 6      | 100          | 400              | 0.25          | 6000  | 2000  | 10.0            | 250      |
| 7      | 100          | 400              | 0.25          | 6000  | 2000  | 10.0            | 500      |
| 8      | 100          | 400              | 0.25          | 6000  | 2000  | 10.0            | 750      |
| 9      | 100          | 400              | 0.25          | 6000  | 2000  | 10.0            | 1500     |
| 10     | 100          | 400              | 0.25          | 6000  | 2000  | 10.0            | 2000     |
| 11     | 100          | 400              | 0.25          | 6000  | 2000  | 10.0            | 3000     |
| 12     | 100          | 400              | 0.25          | 6000  | 2000  | 3.0             | 1000     |
| 13     | 100          | 400              | 0.25          | 6000  | 2000  | 5.0             | 1000     |
| 14     | 100          | 400              | 0.25          | 6000  | 2000  | 15.0            | 1000     |
| 15     | 100          | 400              | 0.25          | 6000  | 2000  | 20.0            | 1000     |

$\alpha_{cn}$  : Ratio of the chemical network to the total networks;  $N_A$ : Number of the physical cross-linked beads (A) in Fig. S1;  $N_B$ : Number of the chemical cross-linked beads (B) in Fig. S1;  $\epsilon_{AA}$  : The A bead-A bead interaction parameter;  $K_{CB}$ : The coefficient for the cross-linked bond potential.
